# Supplementary material for: Blue-shifted ancyromonad channelrhodopsins for multiplex optogenetics
Source: eLife. 2025 Sep 19;14:RP106508. doi: 10.7554/eLife.106508 (PMC12448745; doi:10.7554/eLife.106508)
Supplement: Figure 1—figure supplement 4—source data 1. [file elife-106508-fig1-figsupp4-data1.xlsx]

## Sheet: Sheet1
Figure 1 – figure supplement 4 – Source data 1
Source data for the numerical values shown in (F)
	AnsACR			FtACR		NlCCR			GtACR1			GtACR2
photons 1016 mm-2 s-1	mean	SEM	photons 1016 mm-2 s-1		photons 1016 mm-2 s-1	mean	SEM	photons 1016 mm-2 s-1			photons 1016 mm-2 s-1
0.00288	0	0	0.00311	0	0	0	0	0.00326	0	0	0.00311	0	0
0.01007	1.59604	0.28516	0.01077	0	0	3.73623	0.99207	0.00984	1.99563	0.60803	0.01085	4.78668	0.77951
0.03169	4.58459	0.56447	0.03389	1.78818	0.50186	7.75908	1.97072	0.033	7.25085	1.07493	0.03416	8.47744	1.21935
0.05406	7.11238	0.98361	0.05782	4.79416	0.555	8.55122	2.11683	0.05498	9.85262	1.36443	0.05827	11.1196	1.46324
0.16963	11.727	1.39958	0.18142	16.631	0.68876	10.3707	2.00407	0.19172	14.8975	1.37875	0.18286	15.7007	2.01724
0.58905	15.6204	1.70623	0.63	22.5035	1.0141	9.94925	1.07855	0.57895	16.5584	1.68807	0.63499	20.5765	2.28287
1.86408	18.1607	2.02155	1.99367	17.5203	1.63719	7.7145	0.94294	1.89819	16.0101	1.93096	2.00946	24.3243	2.40997
