# Supplementary material for: Blue-shifted ancyromonad channelrhodopsins for multiplex optogenetics
Source: eLife. 2025 Sep 19;14:RP106508. doi: 10.7554/eLife.106508 (PMC12448745; doi:10.7554/eLife.106508)
Supplement: Figure 1—figure supplement 5—source data 1. [file elife-106508-fig1-figsupp5-data1.xlsx]

## Sheet: Sheet1
Figure 1 – figure supplement 5 – Source data 1
Source data for the numerical values shown in (F)
AnsACR	FtACR	NlCCR	GtACR1	GtACR2
32.8906	50.6295	50.7054	25.7537	36.2894
26.4811	54.3508	43.7555	20.4214	43.4604
35.9638	52.7311	48.0558	27.2681	37.0164
29.1806	67.3203	48.8842	28.6605	37.1624
27.0532	61	43.1045	28.1926	45.2303
32.9642	64.6262	54.7096	32.5885	32.8772
