# Supplementary material for: Blue-shifted ancyromonad channelrhodopsins for multiplex optogenetics
Source: eLife. 2025 Sep 19;14:RP106508. doi: 10.7554/eLife.106508 (PMC12448745; doi:10.7554/eLife.106508)
Supplement: Figure 1—source data 1. [file elife-106508-fig1-data1.xlsx]

## Sheet: Sheet1
Figure 1 – Source data 1
Source data for the protein names and accession numbers used to construct the tree in (A); numerical values for the data shown in (B-F)
(A) A maximum-likelihood phylogenetic tree of selected ChRs
Abbreviation	Full protein name	Genbank #
AnsACR	Ancyromonas sigmoides anion channelrhodopsin	PQ657777
NlCCR	Nutomonas longa cation channelrhodopsin	PQ657779
FtACR	Fabomonas tropica anion channelrhodopsin	PQ657778
VbACR2	Vitrella brassicaformis anion channelrhodpsin 2	CEM28120
PgACR1	Phaeocystis globosa anion channelrhodpsin 1	MT002472
PgACR2	Phaeocystis globosa anion channelrhodpsin 2	MT002475
PaACR2	Phaeocystis globosa anion channelrhodpsin 2	MT002474
PaACR1	Phaeocystis globosa anion channelrhodpsin 1	MT002471
ParsR	Paraphysoderma sedebokerense rhodopsin	PQ657783
GtACR1	Guillardia theta anion channelrhodpsin 1	KP171708
GtACR2	Guillardia theta anion channelrhodpsin 2	KP171709
ZipACR	Proteomonas sulcata anion channelrhodpsin 973	KX879679
RapACR	"Rapid ACR", Rhodomonas salina anion channelrhodpsin 665	MG831192
TaraACR1	TARA anion channelrhodpsin 1	PQ479269
TaraACR2	TARA anion channelrhodpsin 2	PQ479268
CarACR2	Cafeteria roenbergensis anion channelrhodpsin 2	MW557572
CarACR3	Cafeteria roenbergensis anion channelrhodpsin 3	MW557571
CarACR1	Cafeteria roenbergensis anion channelrhodpsin 1	MW557570
vPyACR_21821	viral Pyramimonas anion channelrhodpsin 21821	MT353683
PymeACR1	Pyramimonas melkonianii anion channelrhodpsin 1	MT353682
MsACR1	Mantoniella squamata anion channelrhodpsin 1	PQ479272
sTACR1	Stramenopiles sp. TOSAG23-3 anion channelrhodpsin 1	MW557568
MerMAID1	Metagenomically discovered, Marine, Anion-conducting and Intensely Desensitizing channelrhodopsin 1	MK914541
AtACR1	Ancoracysta twista anion channelrhodpsin 1	PQ657780
SaACR2	Schizochytrium aggregatum anion channelrhodpsin 2	MT002463
AlACR3	Aurantiochytrium limacinum anion channelrhodpsin 3	MT002476
OaACR1	Odontella aurita anion channelrhodpsin 1	PQ657781
OaACR2	Odontella aurita anion channelrhodpsin 2	PQ657782
HfACR1	Hondaea fermentalgiana anion channelrhodpsin 1	MT002469
(B) The photocurrent action spectra
Wavelength (nm)	AnsACR mean	AnsACR SEM	FtACR mean	FtACR SEM	NlCCR mean	NlCCR SEM
380	0.10541	0.00667	0.0638	0.00707	0.11779	0.01541
390	0.1803	0.02018	0.11397	0.00848	0.26454	0.00696
400	0.29892	0.0105	0.18132	0.00508	0.46019	0.01172
410	0.41784	0.01195	0.25443	0.00742	0.59994	0.01642
420	0.58807	0.01618	0.38276	0.00864	0.74997	0.02352
430	0.76193	0.01599	0.52106	0.00603	0.93048	0.00928
440	0.88948	0.01898	0.66932	0.00805	0.9952	0.01528
450	0.97367	0.01336	0.79365	0.00616	1	0.00781
460	1	0.00741	0.90568	0.00572	0.92793	0.00877
470	0.92271	8.0895e-09	0.94103	0	0.82507	0.01293
480	0.8467	0.00709	1	0.00792	0.5508	0.01134
490	0.60896	0.00783	0.88947	0.00762	0.32696	0.01333
500	0.37605	0.01143	0.66787	0.00315	0.16751	0.00551
510	0.2072	0.00824	0.43165	0.00329	0.06847	0.00476
520	0.10862	0.00487	0.24433	0.00297	0.01942	0.00498
530	0.0515	0.00459	0.12617	0.00446	0.0039	0.00591
540	0.02129	0.00454	0.04744	0.00381	0.00548	0.00226
550	0.00949	0.00196	0.02075	0.00391
560			0.01269	0.00412
(C) The absorption spectra of detergent-purified proteins
Wavelength (nm)	AnsACR	FtACR	NlCCR
375	0.37924	0.23683	0.30446
376	0.37898	0.23566	0.31064
377	0.38551	0.24258	0.31884
378	0.39388	0.24657	0.32635
379	0.39262	0.24721	0.33224
380	0.40097	0.25021	0.33931
381	0.40214	0.25724	0.34875
382	0.40929	0.26033	0.35951
383	0.41406	0.26258	0.37023
384	0.42187	0.26679	0.38036
385	0.43097	0.26923	0.39079
386	0.43403	0.27627	0.4009
387	0.44262	0.28309	0.4112
388	0.44855	0.28588	0.42129
389	0.45804	0.28999	0.4321
390	0.46359	0.29966	0.44459
391	0.47065	0.30475	0.45576
392	0.47801	0.30914	0.46798
393	0.48668	0.31305	0.48073
394	0.4946	0.32256	0.49591
395	0.50543	0.33064	0.50923
396	0.51594	0.3366	0.52202
397	0.52415	0.34115	0.53453
398	0.53632	0.3494	0.5482
399	0.5442	0.36299	0.56211
400	0.55425	0.36929	0.5769
401	0.56385	0.37839	0.59207
402	0.57866	0.38613	0.60783
403	0.58952	0.3972	0.62117
404	0.60114	0.40648	0.63523
405	0.61002	0.42026	0.64799
406	0.62523	0.42783	0.6628
407	0.63506	0.4409	0.67669
408	0.64648	0.44789	0.69156
409	0.65605	0.45955	0.70579
410	0.67249	0.47507	0.72055
411	0.67994	0.4863	0.73456
412	0.6922	0.49705	0.7506
413	0.70529	0.50711	0.76538
414	0.71472	0.51827	0.78034
415	0.72655	0.53018	0.79349
416	0.73834	0.5421	0.80788
417	0.74966	0.55464	0.82182
418	0.7613	0.56661	0.83591
419	0.77177	0.57757	0.84929
420	0.78448	0.58672	0.86229
421	0.79567	0.59875	0.87443
422	0.80418	0.60876	0.88466
423	0.81767	0.62213	0.89714
424	0.82856	0.63672	0.90966
425	0.84012	0.64865	0.92151
426	0.85181	0.65976	0.93042
427	0.86022	0.67126	0.93882
428	0.87313	0.68347	0.94915
429	0.88221	0.69545	0.95779
430	0.89247	0.70916	0.96662
431	0.90258	0.7192	0.97372
432	0.91198	0.734	0.97909
433	0.91957	0.74718	0.98166
434	0.9288	0.76136	0.98474
435	0.93392	0.7732	0.98954
436	0.9444	0.78571	0.99409
437	0.95078	0.80185	0.99634
438	0.95545	0.8137	0.99679
439	0.9619	0.82702	0.99705
440	0.96903	0.83604	0.99805
441	0.97287	0.85022	0.99852
442	0.97854	0.86505	0.99886
443	0.98323	0.87427	1
444	0.98532	0.88613	0.99932
445	0.99155	0.89643	0.99832
446	0.99171	0.90364	0.9948
447	0.99427	0.9175	0.99349
448	0.99515	0.9223	0.99006
449	0.99771	0.9313	0.98676
450	0.99844	0.94092	0.98247
451	1.00001	0.95005	0.97936
452	0.99807	0.95487	0.9738
453	0.99675	0.96259	0.96736
454	0.99657	0.96718	0.95945
455	0.99586	0.96952	0.95159
456	0.9917	0.97403	0.94238
457	0.99203	0.97773	0.93017
458	0.98639	0.97985	0.91656
459	0.9844	0.98855	0.90282
460	0.97915	0.9873	0.89021
461	0.97458	0.98979	0.8757
462	0.96723	0.99225	0.85931
463	0.95798	1	0.84042
464	0.9526	0.99535	0.82241
465	0.94531	0.99711	0.80352
466	0.93359	0.99529	0.78281
467	0.92257	0.99718	0.76129
468	0.91348	0.99825	0.73769
469	0.90004	0.99072	0.71567
470	0.8872	0.98988	0.69205
471	0.87383	0.98854	0.66902
472	0.86058	0.98549	0.64425
473	0.84575	0.98091	0.62082
474	0.83088	0.9777	0.596
475	0.81358	0.971	0.57211
476	0.79709	0.96801	0.54728
477	0.7792	0.95847	0.52197
478	0.76041	0.94788	0.49766
479	0.74025	0.93834	0.47346
480	0.72138	0.93026	0.45035
481	0.70055	0.9174	0.42579
482	0.67915	0.90645	0.40306
483	0.66019	0.89306	0.38197
484	0.63907	0.87971	0.36139
485	0.61544	0.86427	0.34092
486	0.59558	0.85083	0.32017
487	0.57405	0.83286	0.30045
488	0.55364	0.81571	0.28157
489	0.52982	0.79596	0.26357
490	0.50955	0.77882	0.24689
491	0.48649	0.75859	0.23084
492	0.46792	0.73792	0.21598
493	0.44722	0.71961	0.20232
494	0.4264	0.69786	0.1885
495	0.4078	0.67644	0.17579
496	0.38724	0.65526	0.16296
497	0.36938	0.63369	0.15135
498	0.34928	0.61168	0.14005
499	0.33276	0.59033	0.12964
500	0.31399	0.56697	0.1195
501	0.29727	0.54555	0.1104
502	0.27916	0.52506	0.10206
503	0.26508	0.50002	0.09436
504	0.24983	0.48071	0.08684
505	0.23499	0.45863	0.08038
506	0.22119	0.4378	0.07405
507	0.20693	0.41703	0.06768
508	0.19515	0.39702	0.0617
509	0.18163	0.37754	0.05724
510	0.17075	0.35771	0.05257
511	0.16094	0.34052	0.04746
512	0.15001	0.32093	0.04204
513	0.1372	0.30331	0.03867
514	0.1299	0.28805	0.03579
515	0.12026	0.27058	0.03355
516	0.1097	0.25594	0.03001
517	0.10445	0.24009	0.02732
518	0.09729	0.22607	0.02399
519	0.08937	0.21263	0.02165
520	0.08285	0.19842	0.02028
521	0.07694	0.18525	0.01891
522	0.07201	0.17444	0.01861
523	0.06766	0.16145	0.01638
524	0.06137	0.15085	0.01454
525	0.05749	0.14075	0.01249
526	0.05033	0.13142	0.01105
527	0.04882	0.12305	0.01042
528	0.04417	0.11375	0.00952
529	0.04216	0.10667	0.009
530	0.0374	0.097	0.00775
531	0.03503	0.09226	0.00717
532	0.03108	0.08344	0.00633
533	0.02948	0.07756	0.00613
534	0.02611	0.07181	0.00541
535	0.02371	0.06556	0.00467
536	0.02125	0.06111	0.00363
537	0.0192	0.05557	0.00314
538	0.01965	0.05078	0.00303
539	0.01711	0.04651	0.00307
540	0.01513	0.04332	0.00301
541	0.0142	0.03925	0.00262
542	0.01247	0.03525	0.00253
543	0.01238	0.03259	0.00157
544	0.01023	0.03032	0.0018
545	0.00918	0.02706	0.00163
546	0.00897	0.02496	0.00161
547	0.00778	0.02229	0.00169
548	0.00637	0.02066	0.00129
549	0.00721	0.01877	0.00182
550	0.00541	0.01506	0.00145
551	0.006	0.01529	0.00238
552	0.00521	0.014	0.00164
553	0.00427	0.01221	0.000971389
554	0.00347	0.01123	0.000339251
555	0.00227	0.00996	0.000619292
556	0.00272	0.01082	0.000836853
557	0.00366	0.00781	0.000691854
558	0.00322	0.00731	0.000376823
559	0.00138	0.00726	-0.00040952
560	0.00191	0.00588	-0.000219289
561	0.0013	0.0064	-0.000301409
562	0.00146	0.00456	0.00027254
563	0.00024735	0.00449	6.30695e-05
564	0.000473567	0.00298	0.000271043
565	0.00148	0.00306	0.000503041
566	0.00246	0.0033	0.000945735
567	0.00221	0.00293	0.00134
568	0.00060555	0.0022	0.000808148
569	0.000916828	0.00181	-0.000150477
570	0.00263	0.00112	0.000220942
571	0.00106	0.00184	0.000295589
572	0.00216	0.00239	0.000675129
573	0.000989998	0.00141	0.00065982
574	0.00186	0.00194	0.000672834
575	-1.66457e-05	0.000692864	0.000646942
576	0.000714123	0.000513681	0.00064596
577	0.00162	0.00141	0.000915439
578	0.000509948	0.000824866	0.000888098
579	0.000881156	0.000588878	-0.0001016
580	0.00156	-0.000366413	7.51631e-05
581	0.000520665	0.000322425	0.000602866
582	0.00211	0.000230841	6.1447e-05
583	-0.000465431	0.000316241	0.00019364
584	0.000476566	-3.78017e-05	-0.00114
585	0.00035846	-0.000100852	-4.14632e-05
586	0.000189925	0.000257324	-0.000549868
587	0.00184	0.00044168	0.000404757
588	-7.39718e-05	-0.00039874	-0.000174806
589	0.00141	-0.00078271	-0.000181996
590	0.00121	0.000484602	1.46292e-05
591	0.0019	8.49231e-05	0.000289538
592	0.000687221	0.000109361	0.000763453
593	0.00155	0.000280614	0.000315773
594	0.000270409	-0.000344991	0.000412812
595	0.000103302	0.000184256	0.000110647
596	0.000212044	0.000453119	0.000127906
597	0.000674921	-0.000697119	-0.000118907
598	0.000615077	-0.000325287	-0.000145584
599	0.000331552	0.000334519	-0.00014054
600	0.00034566	-2.00421e-06	-2.96919e-05
601	0.000240581	-0.000301322	0.000250292
602	-0.000197014	-0.000151117	-0.000362258
603	0.000914575	-5.53883e-05	-0.000152415
604	-0.000144194	-0.000148743	-0.000203056
605	0.000669853	-0.000814981	0.000446385
606	5.86835e-05	-0.000680696	0.000418333
607	0.000239561	-0.000498087	0.000339503
608	0.0004205	-0.000412875	0.000392255
609	-0.000140726	-0.000481895	0.000259917
610	-0.00105	-0.000738531	0.000480698
611	-0.000187291	-0.0012	0.000624225
612	-0.000673622	-0.00107	0.000520164
613	-0.000593886	-0.00118	0.000373852
614	-0.00158	-0.00151	-0.000304699
615	-0.00141	-0.00214	6.59733e-05
616	0.000596649	-0.00222	-0.000653167
617	0.000475641	-0.00213	-0.000752775
618	0.00134	-0.00134	-0.00131
619	0.000342332	-0.00184	-0.00088118
620	0.000724636	-0.00184	-0.000585469
621	-0.000388952	-0.00133	-0.000257183
622	0.000232231	-0.00166	3.37304e-05
623	-0.000394703	-0.0019	0.000239934
624	-0.00121	-0.00167	-0.000112813
625	-0.00104	-0.00192	-0.000436702
626	-0.000340205	-0.00207	1.54083e-05
627	-0.000241556	-0.00232	0.000569168
628	-4.6568e-05	-0.00216	0.000799155
629	-0.000829529	-0.00188	0.000431795
630	-0.000331046	-0.0023	-3.88146e-05
631	-0.0012	-0.00164	0.000261275
632	-0.000258307	-0.00173	0.000348029
633	-0.000734049	-0.00253	0.00077467
634	-0.000206406	-0.00273	-8.87821e-05
635	0.000199229	-0.00266	-0.000457487
636	0.000374189	-0.00244	-0.000698605
637	-0.000562516	-0.00202	-0.000216492
638	-0.000502505	-0.00221	0.00023935
639	-0.000190927	-0.00221	-0.000218964
640	0.000493596	-0.0013	-0.000387885
641	-0.00106	-0.00235	-0.000695311
642	0.000635415	-0.00199	5.17859e-05
643	0.000964744	-0.00151	-4.20832e-06
644	0.000475961	-0.00207	-0.000144674
645	-0.000774298	-0.0022	-0.000413033
646	-0.000365463	-0.00182	-0.000529314
647	0.00017286	-0.00236	-0.000723173
648	0.000901241	-0.000892751	-0.00131
649	0.000658877	-0.002	-0.00113
650	-0.000943087	-0.00125	-0.000785027
(D) The action spectra of photocurrents at -60 mV upon co-expression of AnsACR and Chrimson, compared to each gene expressed alone
Wavelength (nm)	AnsACR+Chrimson mean (pA ms-1)	AnsACR+Chrimson SEM (pA ms-1)	AnsACR mean (rel. u.)	AnsACR SEM (rel. u.)	Chrimson mean (rel. u.)	Chrimson SEM (rel. u.)
380	2.77361	0.96501	0.10541	0.00667
390	7.52271	2.77335	0.1803	0.02018
400	14.2468	3.82464	0.29892	0.0105	-5.02253	0.85334
410	25.0029	5.54311	0.41784	0.01195	-5.58282	0.65433
420	40.1025	8.63002	0.58807	0.01618	-5.98418	0.78218
430	55.7595	11.6062	0.76193	0.01599	-5.83452	1.10492
440	70.9894	15.0669	0.88948	0.01898	-5.50947	1.01476
450	79.0126	16.4355	0.97367	0.01336	-7.82533	0.43632
460	80.4127	17.0956	1	0.00741	-8.7743	1.20832
470	72.23	16.35	0.92271	8.0895e-09	-10.4429	0.71758
480	60.483	15.3638	0.8467	0.00709	-15.7785	0.74718
490	31.7686	11	0.60896	0.00783	-21.3966	0.68687
500	1.13702	7.63955	0.37605	0.01143	-25.027	0.93019
510	-26.8476	6.51045	0.2072	0.00824	-33.1293	1.46545
520	-43.0966	6.90792	0.10862	0.00487	-41.4888	0.8961
530	-46.0214	6.83889	0.0515	0.00459	-43.5557	1.93027
540	-49.4755	6.9531	0.02129	0.00454	-46.1733	1.72469
550	-55.5978	7.7272	0.00949	0.00196	-54.3492	0.76241
560	-61.6984	8.13865			-60.4396	0.40232
570	-65.5933	9.03817			-62.7903	0.67117
580	-67.8549	9.20602			-69.3599	0
590	-69.3613	9.68611			-67.0641	0.74179
600	-69.1252	9.24947			-67.3979	1.3103
610	-65.9077	8.90477			-63.5844	1.09468
620	-59.8988	8.42455			-51.1049	0.71873
630	-48.6246	6.63062			-38.8229	1.36131
640	-36.2223	4.78275			-31.634	0.57859
650	-24.1709	3.56413			-17.8629	2.04381
660	-15.6775	1.94102			-9.76875	0.34531
670	-7.81622	1.3734			-4.2721	0.97033
680	-3.77498	0.89744			-3.6995	0.9869
690	-1.08858	0.5745			-1.1726	0.57532
(E) The dependence of the peak current amplitude on the photon flux density for the indicated ChRs activated at their respective λmax
Photons 1016 mm2 s-1	AnsACR mean (rel. u.)	AnsACR SEM (rel. u.)	Photons 1016 mm2 s-1	FtACR mean (rel. u.)	FtACR SEM (rel. u.)	Photons 1016 mm2 s-1	NlCCR mean (rel. u.)	NlCCR SEM (rel. u.)	Photons 1016 mm2 s-1	GtACR1 mean (rel. u.)	GtACR1 SEM (rel. u.)	Photons 1016 mm2 s-1	GtACR2 mean (rel. u.)	GtACR2 SEM (rel. u.)
						0.00087913	0.06105	0.01172	0.000871268	0.000871268	0.14587	0.00109	0.02569	0.00109	0.08188	0.01198
0.00288	0.04291	0.00918	0.00308	0.04648	0.00787	0.0025	0.17585	0.01808	0.00326	0.00326	0.35671	0.00311	0.03517	0.00311	0.25405	0.02284
0.01007	0.21781	0.03878	0.01077	0.11939	0.00728	0.00873	0.40802	0.04246	0.00984	0.00984	0.58003	0.01085	0.04119	0.01085	0.44698	0.02969
0.03169	0.47676	0.04913	0.03389	0.29031	0.01648	0.02747	0.6231	0.04378	0.03227	0.03227	0.75345	0.03416	0.03639	0.03416	0.67188	0.0328
0.05406	0.65096	0.05013	0.05782	0.44095	0.01806	0.04687	0.69483	0.03961	0.05847	0.05847	0.80299	0.05827	0.02894	0.05827	0.77043	0.02623
0.16963	0.86199	0.02196	0.18142	0.76567	0.0191	0.14706	0.86363	0.02731	0.19172	0.19172	0.9081	0.18286	0.02058	0.18286	0.88732	0.01841
0.58905	0.96078	0.00673	0.63	0.92458	0.01207	0.51067	0.9395	0.02539	0.57895	0.57895	0.96497	0.63499	0.0157	0.63499	0.95554	0.01251
1.86408	0.95945	0.01735	1.99367	0.86878	0.01463	1.61605	0.97037	0.01163	1.89819	1.89819	0.98817	2.00946	0.00482	2.00946	0.97113	0.00795
(F) The dependence of the reciprocal time to the peak on the photon flux density for the indicated ChRs activated at their respective λmax
Photons 1016 mm2 s-1	AnsACR mean (ms-1)	AnsACR SEM (ms-1)	Photons 1016 mm2 s-1	FtACR mean (ms-1)	FtACR SEM (ms-1)	Photons 1016 mm2 s-1	NlCCR mean (ms-1)	NlCCR SEM (ms-1)	Photons 1016 mm2 s-1	GtACR1 mean (ms-1)	GtACR1 SEM (ms-1)	Photons 1016 mm2 s-1	GtACR2 mean (ms-1)	GtACR2 SEM (ms-1)
						0.00087913			0.000871268			0.00109
0.00288			0.00308			0.0025			0.00326			0.00311
0.01007	0.00282	0.00013593	0.01077			0.00873	0.00233	0.000340525	0.00984	0.0021	0.000131425	0.01085	0.004	0.0002585
0.03169	0.00393	0.000124745	0.03389	0.00307	0.000334915	0.02747	0.00405	0.000167203	0.03227	0.00506	0.000778259	0.03416	0.007	0.0003839
0.05406	0.00512	0.000335301	0.05782	0.00438	0.000331457	0.04687	0.00453	0.00030809	0.05847	0.00801	0.000995103	0.05827	0.01	0.0003643
0.16963	0.00853	0.000384927	0.18142	0.01137	0.000540438	0.14706	0.00799	0.000641319	0.19172	0.02098	0.00147	0.18286	0.019	0.0006851
0.58905	0.01803	0.000997611	0.63	0.02398	0.000933257	0.51067	0.01846	0.000340525	0.57895	0.04473	0.00247	0.63499	0.046	0.003
1.86408	0.04805	0.00346	1.99367	0.05193	0.00571	1.61605	0.0431	0.000340525	1.89819	0.10428	0.00756	2.00946	0.097	0.003
