# Supplementary material for: Blue-shifted ancyromonad channelrhodopsins for multiplex optogenetics
Source: eLife. 2025 Sep 19;14:RP106508. doi: 10.7554/eLife.106508 (PMC12448745; doi:10.7554/eLife.106508)
Supplement: Figure 2—figure supplement 1—source data 1. [file elife-106508-fig2-figsupp1-data1.xlsx]

## Sheet: Sheet1
Figure 2 – figure supplement 1 – Source Data 1
Source data for the numbers of cells sampled and numerical values shown in (A-D).
(A)		(B)
AnsACR (n = 85 cells)	FtACR (n = 104 cells)	NlCCR (n = 115 cells)	PsChR2 (n = 36 cells)
1.62801	0.05177	14.07	0.01735
-0.0189	0.02133	0.24505	0.00435
0.0141	0.46425	0.18696	0.003
0.03769	0.01683	0.15875	0.01324
0.0267	0.01191	0.8143	0.17729
0.02413	0.21984	0.84345	0.03386
0.02018	0.02701	0.02863	0.0519
0.18074	0.86802	0.01447	0.01441
1.35539	0.3008	0.10674	0.000458099
0.00314	0.02411	0.03015	0.02842
0.01951	0.07531	0.04269	5.36488
2.88487	0.4304	0.38848	0.01405
0.40451	0.01948	0.01734	0.03763
1.06863	0.01883	0.02317	0.02323
1.97116	0.02597	0.01586	0.02285
0.10098	0.02182	0.03098	6.61067
0.04576	0.03292	0.02071	0.03151
0.01379	0.01952	0.0126	0.62035
0.03013	0.03358	4.61803	0.02039
2.96462	0.15962	0.04516	2.02302
0.02436	0.04558	0.95457	0.01807
0.70643	0.02213	0.04655	-0.03309
0.137	0.02976	6.60028	0.01419
0.06886	0.03353	0.02671	0.03354
0.02359	0.23378	0.0239	0.02109
0.10123	0.02324	0.20708	0.00867
2.35653	0.14283	0.0331	0.01494
0.02847	0.02297	0.02628	0.02472
1.85866	0.44016	0.04254	0.01346
0.71125	0.01872	1.22697	0.01145
0.01899	0.02533	0.07949	0.00932
0.01887	0.01957	0.02261	0.01809
-0.02036	-0.01426	0.02479	0.0259
0.01968	-0.01278	0.03486	0.02041
0.0198	0.02532	0.01638	0.02052
0.13475	0.02076	0.02444	0.0134
0.59428	0.27432	0.40007
0.0109	0.02524	-0.03897
1.13811	0.0405	0.11989
-0.02335	0.01373	0.04368
0.03315	0.01317	0.02254
1.61381	0.03983	0.02255
0.77595	0.20834	0.06592
0.00659	0.03166	0.06489
1.04195	0.01854	0.05167
0.02548	0.01837	0.01858
1.24626	-0.02132	0.05517
0.03197	0.01845	0.02328
0.02017	0.12369	0.01949
-0.02115	0.30388	0.01597
0.02182	0.18399	0.2381
2.24925	0.15082	0.04028
0.02367	0.01922	3.47253
0.02731	0.02789	0.03527
2.69796	0.02045	0.04471
0.05935	0.03133	0.01676
-0.02173	0.01364	0.01711
0.0193	0.21537	0.02117
0.0178	0.02805	0.03863
0.02716	0.0237	0.51365
0.02521	0.02715	9.26568
0.01972	0.0443	1.95792
0.10343	0.04809	0.1419
0.01328	0.02703	0.43799
0.05646	0.02118	0.04267
0.02284	0.02645	0.02548
0.01264	0.01986	0.14115
0.02082	0.01853	0.53545
0.01724	0.01595	0.07588
0.03767	0.21098	0.15656
0.02399	0.01202	0.03251
0.05508	0.01934	5.17769
0.25651	0.01266	0.05564
0.00937	0.01931	3.83767
0.49106	0.0546	0.04601
0.01167	0.03579	0.06382
2.32721	0.02104	3.50499
0.4983	0.0209	0.06745
1.96382	0.0291	0.0223
0.03987	0.02216	0.04051
0.0212	0.02678	0.1096
0.04609	0.22936	0.10855
0.01769	0.01868	0.13544
0.02054	0.20505	0.05969
0.01217	0.02184	0.03686
	0.02762	0.15644
	0.01932	4.16973
	0.02245	0.09673
	0.10456	0.0451
	0.06109	0.06803
	0.09263	0.2895
	0.03644	0.04027
	0.05756	0.04041
	0.04994	0.05435
	0.19361	0.02475
	0.03699	0.01349
	0.04278	0.62293
	0.05356	0.07608
	0.0358	0.01544
	0.04695	0.31053
	0.05374	0.1917
	0.06664	4.57917
	0.0598	0.036
	0.07727	0.09076
		10.5284
		1.25688
		0.0352
		0.01519
		0.02195
		0.03229
		0.01527
		0.01378
		0.0766
		0.01878
		0.01963
(C, D) The Vr shifts (mV) measured upon replacing Na+ with NMDG+ in the external solution (C), and upon its acidification from pH 7.4 to 5.4 (D)
(C)		(D)
NlCCR (n = 27 cells)	CrChR2 (n = 5 cells)	NlCCR (n = 15 cells)	CrChR2 (n = 13 cells)
-29.2385	-43.5	-4	40.3
-32.2385	-28.5	-3	57.3
-31.2385	-38.5	-5	52.3
-40.2385	-33.5	-4	47.3
-26.2385	-44.5	1	40.3
-27.2385		-2	33.3
-33.2385		-2	38.3
-28.2385		-3	56.3
-30.2385		-3	51.3
-37.2385		-3	50.3
-33.2385		-3	59.3
-39.2385		-6	48.3
-46.2385		-5	52.3
-29.2385		-2
-46.2385		-3
-37.2385
-35.2385
-30.2385
-31.2385
-32.2385
-39.2385
-32.2385
-31.2385
-37.2385
-33.2385
-30.2385
-31.2385
