# Supplementary material for: Blue-shifted ancyromonad channelrhodopsins for multiplex optogenetics
Source: eLife. 2025 Sep 19;14:RP106508. doi: 10.7554/eLife.106508 (PMC12448745; doi:10.7554/eLife.106508)
Supplement: Figure 2—source data 1. [file elife-106508-fig2-data1.xlsx]

## Sheet: Sheet1
Figure 2 – Source data 1
Source data for the numbers of cells sampled and numerical values shown in (D-J)
(D-F) The IV curves of the peak photocurrent
Holding voltage (mV)	(D) AnsACR mean	(D) AnsACR SEM	(E) FtACR mean	(E) FtACR SEM	(F) NlCCR mean	(F) NlCCR SEM
-87.3	-1.18291	0.18137	-0.32837	0.06058	-2.13765	0.52645
-67.3	-0.65102	0.10166	-0.19317	0.03706	-1.45292	0.37941
-47.3	-0.13315	0.02896	-0.05239	0.01061	-0.92708	0.25208
-27.3	0.39302	0.06252	0.09171	0.01557	-0.48277	0.13528
-7.3	0.83445	0.13121	0.17801	0.02915	-0.06528	0.03493
12.7	1.27642	0.20055	0.25947	0.04604	0.36403	0.11991
32.7	1.69039	0.26904	0.31127	0.06425	0.83838	0.27395
52.7	2.08314	0.3347	0.36373	0.08542	1.29972	0.4035
(D-F) The IV curves of the current at the end of illumination
Holding voltage (mV)	(D) AnsACR mean	(D) AnsACR SEM	(E) FtACR mean	(E) FtACR SEM	(F) NlCCR mean	(F) NlCCR SEM
-87.3	-1.01615	0.16062	-0.21676	0.03741	-1.80276	0.43877
-67.3	-0.56301	0.0914	-0.12013	0.02227	-1.24382	0.32502
-47.3	-0.10554	0.02739	-0.02519	0.00429	-0.79952	0.22189
-27.3	0.3304	0.05441	0.05584	0.01322	-0.42431	0.11921
-7.3	0.74113	0.11781	0.12656	0.02796	-0.07912	0.02591
12.7	1.15227	0.18271	0.20187	0.04249	0.30923	0.11473
32.7	1.5413	0.24648	0.26261	0.05892	0.75498	0.2624
52.7	1.91607	0.30945	0.32771	0.07598	1.18652	0.39045
(G) Comparison of the Vr at the photocurrent peak time and the end of illumination
AnsACR peak	AnsACR end	FtACR peak	FtACR end	NlCCR peak	NlCCR end
-46.3	-47.3	-49.3	-46.3	-7.3	-7.3
-44.3	-45.3	-38.3	-40.3	-6.3	-6.3
-43.3	-46.3	-41.3	-42.3	-7.3	-7.3
-41.3	-40.3	-41.3	-42.3	-4.3	-4.3
-41.3	-43.3	-38.3	-39.3	-1.3	0.7
-46.3	-46.3	-36.3	-37.3	-7.3	-5.3
-37.3	-37.3	-39.3	-40.3	-3.3	-4.3
-44.3	-46.3	-33.3	-32.3	-4.3	-2.3
-48.3	-48.3	-44.3	-41.3	-2.3	-3.3
-40.3	-41.3	-38.3	-40.3	-6.3	-7.3
-40.3	-40.3	-40.3	-41.3	-6.3	-6.3
-43.3	-43.3	-39.3	-38.3	2.7	4.7
-41.3	-41.3	-40.3	-40.3	-0.3	-0.3
-43.3	-43.3	-46.3	-45.3	-3.3	-0.3
-42.3	-43.3	-46.3	-44.3	-1.3	-1.3
-39.3	-38.3	-43.3	-40.3	-3.3	-4.3
-38.3	-38.3			-3.3	-2.3
-40.3	-40.3			-3.3	-4.3
				-10.3	-9.3
				-2.3	-2.3
				1.7	1.7
				2.7	3.7
				-1.3	2.7
				2.7	2.7
				1.7	1.7
				2.7	2.7
(H-J) The Vr shift values measured upon replacement of the standard (NaCl-based) external solution with the indicated solutions
(H) AnsACR
NaAsp (n = 24 cells)	NaNO3 (n = 10 cells)	NMDGCl (n = 19 cells)	NaCl pH 5.4 (n = 9 cells)	KCl (n = 16 cells)
69.9	-41.8	-2.5	-5.3	2.4
76.9	-34.8	-3.5	-3.3	0.4
73.9	-36.8	-2.5	-2.3	1.4
70.9	-34.8	-4.5	3.7	-1.6
83.9	-35.8	2.5	1.7	0.4
70.9	-35.8	1.5	1.7	0.4
70.9	-34.8	7.5	-0.3	7.4
71.9	-35.8	4.5	-0.3	5.4
68.9	-34.8	5.5	1.7	6.4
64.9	-31.8	5.5		3.4
61.9		4.5		4.4
65.9		7.5		5.4
61.9		8.5		3.4
65.9		5.5		4.4
64.9		4.5		3.4
60.9		3.5		2.4
63.9		10.5
60.9		5.5
41.9		7.5
50.9
74.9
53.9
68.9
71.9
(I) FtACR
NaAsp (n = 20 cells)	NaNO3 (n = 18 cells)	NMDGCl (n = 9 cells)	NaCl pH 5.4 (n = 6 cells)	KCl (n = 9 cells)
48.7	-61	3.3	-1.5	2.2
48.7	-45	2.3	-2.5	2.2
68.7	-62	7.3	2.5	1.2
67.7	-65	6.3	-0.5	6.2
67.7	-63	4.3	0.5	6.2
76.7	-51	4.3	2.5	3.2
61.7	-53	4.3		4.2
70.7	-53	7.3		2.2
69.7	-46	1.3		2.2
77.7	-44
87.7	-46
70.7	-44
70.7	-45
44.7	-43
46.7	-41
45.7	-42
55.7	-40
64.7	-47
72.7
62.7
(J) NlCCR
NaAsp (N = 20 cells)	NaNO3 (n = 18 cells)	NMDGCl (n = 27 cells)	NaCl pH 5.4 (n = 15 cells)	KCl (n = 14 cells)
-3.8	3.5	-29.2	-4	-4.3
-6.8	3.5	-32.2	-3	-3.3
0.2	2.5	-31.2	-5	0.7
5.2	3.5	-40.2	-4	-1.3
2.2	3.5	-26.2	1	0.7
1.2	2.5	-27.2	-2	-5.3
2.2	1.5	-33.2	-2	0.7
6.2	0.5	-28.2	-3	-4.3
-0.8	2.5	-30.2	-3	-1.3
0.2	3.5	-37.2	-3	-1.3
5.2	-0.5	-33.2	-3	-0.3
2.2	1.5	-39.2	-6	0.7
2.2	-1.5	-46.2	-5	0.7
6.2	1.5	-29.2	-2	-2.3
4.2	-0.5	-46.2	-3
4.2	1.5	-37.2
3.2	1.5	-35.2
3.2	1.5	-30.2
5.2		-31.2
8.2		-32.2
		-39.2
		-32.2
		-31.2
		-37.2
		-33.2
		-30.2
		-31.2
