# Supplementary material for: Blue-shifted ancyromonad channelrhodopsins for multiplex optogenetics
Source: eLife. 2025 Sep 19;14:RP106508. doi: 10.7554/eLife.106508 (PMC12448745; doi:10.7554/eLife.106508)
Supplement: Figure 3—figure supplement 1—source data 1. [file elife-106508-fig3-figsupp1-data1.xlsx]

## Sheet: Sheet1
Figure 3 – figure supplement 1 – Source Data 1
Source data for the numerical values shown in (A, B, and D).
(A) The voltage dependence of the amplitudes of the channel closing and opening components in AnsACR
Holding voltage (mV)	Fast opening (nA)	Slow opening (nA)	Fast closing (nA)	Slow closing (nA)	Peak (nA)
-64.4	2.08639	0.18194	-1.02983	-0.17733	-1.16175
-34.4	0.9101	0.08719	-0.54086	-0.02105	-0.53783
-4.4	0.05735	0.01482	-0.00826	-0.04529	-0.05156
25.6	-0.70026	-0.07108	0.32847	0.0335	0.34654
55.6	-1.33009	-0.12586	0.5262	0.21185	0.69986
(B) The voltage dependence of the amplitudes of the channel closing and opening components in FtACR
Holding voltage (mV)	Fast opening (nA)	Slow opening (nA)	Fast closing (nA)	Slow closing (nA)
-64.4	0.27872	0.09847	-0.31305	-0.04231
-34.4	0.11001	0.03597	-0.10941	-0.01332
-4.4	-0.04112	-0.01113	0.0355	0.00886
25.6	-0.18661	-0.07658	0.16541	0.076
55.6	-0.31902	-0.12562	0.2385	0.11474
(D) The voltage dependence of the amplitudes of the channel closing and opening components in NlCCR
Holding voltage (mV)	Opening Cl- (rel. u.)	Closing Cl- (rel. u.)	Holding voltage (mV)	Opening Asp- (rel. u.)	Closing Asp- (rel. u.)
-64.4	1.00029	-0.88438	-53	1.00032	-0.83757
-34.4	0.44614	-0.38978	-23	0.36097	-0.29717
-4.4	-0.0027	0.00253	7	-0.23371	0.19605
25.6	-0.5465	0.46487	37	-0.95898	0.78536
