# Supplementary material for: Blue-shifted ancyromonad channelrhodopsins for multiplex optogenetics
Source: eLife. 2025 Sep 19;14:RP106508. doi: 10.7554/eLife.106508 (PMC12448745; doi:10.7554/eLife.106508)
Supplement: Figure 4—figure supplement 2—source data 1. [file elife-106508-fig4-figsupp2-data1.xlsx]

## Sheet: Sheet1
Figure 4 – figure supplement 2 – Source Data 1
Source data for the numerical values shown in (A, B, and D).
(A) The voltage dependence of the fast AnsACR_G86E current at pH 7.4 and 5.4
	pH 7.4		pH 5.4
Holding voltage (mV)	Fast current (pA)	Fast current (pA)
-64.4	-37.9522	-251.599
-34.4	-27.8498	-210.392
-4.4	-16.2116	-175.913
25.6	-5.05119	-140.547
(B) The voltage dependence of the AnsACR_G86E channel current at pH 5.4 in the Cl--based bath (black) and the Asp--based bath
	NaCl pH 5.4		NaAsp pH 5.4
Holding voltage (mV)	Channel current (pA)	Holding voltage (mV)	Channel current (pA)
-64.4	-75.9034	-53	-72.221
-34.4	-27.96	-23	-31.0372
-4.4	-2.29785	7	-11.3414
25.6	9.72491	37	0.06059
(D) pH titration of the absorbance difference at 297 nm in the purified G86E mutant and WT
pH	G86E	pH	WT
8.3	0.01656	8	0.00398
8.6	0.01902	8.60024	0.00962
8.9	0.03345	9.79962	0.0739
9.1	0.03424	10.9	0.38902
9.4	0.04123	11.4	0.70544
9.7	0.08344	11.7	0.80409
10.2	0.19481	12	0.87496
10.6	0.3862	12.4002	0.94595
10.9	0.51927	12.8003	0.97
11.4	0.79226
