# Supplementary material for: Blue-shifted ancyromonad channelrhodopsins for multiplex optogenetics
Source: eLife. 2025 Sep 19;14:RP106508. doi: 10.7554/eLife.106508 (PMC12448745; doi:10.7554/eLife.106508)
Supplement: Figure 4—source data 1. [file elife-106508-fig4-data1.xlsx]

## Sheet: Sheet1
Figure 4 – Source data 1
Source data for the numerical values shown in (A-D, F, and G).
(A) pH titration of λmax and maximal absorption changes in wild-type AnsACR
pH	λmax (nm)	pH	ΔAbsorbance (mOD)
1	460.5	2.6	39.3541
1.2	460.677	2.8	38.3226
1.4	460.937	3	36.185
1.6	461.364	3.3	33.6516
1.8	461.623	3.6	28.2063
2	461.881	3.9	25.7757
2.2	462.01	4.2	19.2217
2.4	462.051	4.5	9.68468
2.6	462	4.7	8.92437
2.8	461.667	5	5.29594
3	461.333	5.6	3.6694
3.3	460.667	6	1.78374
3.6	460	6.3	3.97884
3.9	458.667
4.2	457
4.5	455.667
4.7	455
5	454.667
5.6	454.333
6	454
6.3	454
6.6	454
7.1	454
7.5	454
8	454
8.6	454
9.8	453.837
10.9	453.333
11.4	452.667
(B) pH titration of λmax in FtACR
pH	λmax (nm)
0.6	438
0.8	444
1	449
1.2	457
1.4	465
1.6	470
1.8	474
2.2	475
2.5	473
2.9	471
3.2	469
3.4	468
3.6	467
3.8	467
4	467
4.3	467
4.5	467
4.8	467
5	467
5.2	467
5.5	467
5.8	467
6	467
6.2	467
6.4	467
6.6	467
6.8	467
7	467
7.2	467
(C) pH titration of λmax in NlCCR
pH	λmax (nm)
1	447
1.2	448
1.4	451
1.6	453
1.8	456
2.1	458.2
2.3	458.9
2.6	458.9
2.9	457
3.1	455.8
3.3	454
3.6	450.6
3.9	446.7
4.8	442.9
5.5	442
5.7	442
6	442
6.5	442
7	441.8
7.2	441.7
7.4	442
7.7	441.7
7.9	441.4
8.1	441.3
(D) The photocurrent action spectrum of the AnsACR_D226N mutant compared to the WT
Wavelength (nm)	AnsACR_D226N mean	AnsACR_D226N SEM	WT mean	WT SEM
380	0.0982	0.00621	0.10541	0.00667
390	0.16517	0.00861	0.1803	0.02018
400	0.25939	0.00561	0.29892	0.0105
410	0.3521	0.00863	0.41784	0.01195
420	0.50172	0.00922	0.58807	0.01618
430	0.67505	0.00757	0.76193	0.01599
440	0.80852	0.01008	0.88948	0.01898
450	0.93715	0.00878	0.97367	0.01336
460	0.98368	0.00306	1	0.00741
470	1	0	0.92271	8.0895e-09
480	0.90454	0.00522	0.8467	0.00709
490	0.70636	0.007	0.60896	0.00783
500	0.47537	0.00287	0.37605	0.01143
510	0.27198	0.00535	0.2072	0.00824
520	0.15201	0.00484	0.10862	0.00487
530	0.06419	0.0047	0.0515	0.00459
540	0.02817	0.00436	0.02129	0.00454
550			0.00949	0.00196
(F) The voltage dependence of the decay components τ in the AnsACR_D226N mutant and the WT
Holding voltage (mV)	D226N	WT fast closing	WT slow closing
-64.4	46.1239	52.9488	95.8855
-34.4	52.6786	49.8975	85
-4.4	50.4711	38.5514	76.818
25.6	60.8573	33.3929	70.818
55.6		26.1541	50.0229
(G) pH titration of lmax in AnsACR_G86E mutant
pH	λmax (nm)
2.4	461.236
2.7	461.236
3	461
3.3	460.764
3.6	460.525
4	460
4.3	459
4.7	457.667
5	456.667
5.3	455.667
5.6	455
6.1	453.667
6.5	452.333
6.8	451
7.1	449
7.5	446.807
7.6	444.333
7.9	443
8.3	441.667
8.6	441
8.9	440.333
9.4	439.667
9.7	439.667
10.2	439.667
10.6	439.425
10.9	439.329
11.4	439.425
