# Supplementary material for: Blue-shifted ancyromonad channelrhodopsins for multiplex optogenetics
Source: eLife. 2025 Sep 19;14:RP106508. doi: 10.7554/eLife.106508 (PMC12448745; doi:10.7554/eLife.106508)
Supplement: Figure 5—figure supplement 1—source data 1. [file elife-106508-fig5-figsupp1-data1.xlsx]

## Sheet: Sheet1
Figure 5 – figure supplement 1 – Source Data 1
Source data for the numbers of cells sampled and numerical values shown in (A-D).
(A)
Wavelength (nm)	AnsACR mean (n = 14 cells)	AnsACR SEM	AnsACR_A229C mean (n = 8 cells)	AnsACR_A229C SEM	AnsACR_A229S mean (n = 8 cells)	AnsACR_A229S SEM	AnsACR_M134A mean (n = 8 cells)	AnsACR_M134A SEM	AnsACR_M134G mean (n = 8 cells)	AnsACR_M134G SEM
380	0.10541	0.00667	0.09435	0.0136	0.12628	0.01362	0.07582	0.01124	0.06304	0.00848
390	0.1803	0.02018	0.20486	0.01196	0.22671	0.01616	0.14399	0.00881	0.1399	0.01345
400	0.29892	0.0105	0.28711	0.00762	0.343	0.01982	0.22628	0.01057	0.25805	0.01254
410	0.41784	0.01195	0.40936	0.01174	0.46451	0.02957	0.32442	0.01147	0.35279	0.02184
420	0.58807	0.01618	0.5608	0.00546	0.6397	0.03136	0.47163	0.01527	0.51588	0.01014
430	0.76193	0.01599	0.72071	0.00705	0.7781	0.03017	0.6467	0.01289	0.6689	0.00962
440	0.88948	0.01898	0.86171	0.00962	0.90269	0.02921	0.8042	0.01226	0.82121	0.00801
450	0.97367	0.01336	0.94143	0.00754	0.98049	0.0221	0.91883	0.00891	0.93015	0.01609
460	1	0.00741	1	0.01102	1	0.01662	0.98108	0.00528	1	0.01932
470	0.92271	8.0895e-09	0.89063	0.00114	0.92975	0	1	0	0.99302	0
480	0.8467	0.00709	0.86869	0.00697	0.85302	0.01426	0.86383	0.00556	0.87839	0.02302
490	0.60896	0.00783	0.63231	0.00546	0.64502	0.01972	0.64794	0.00586	0.66143	0.01604
500	0.37605	0.01143	0.43108	0.01284	0.41594	0.01649	0.39898	0.0066	0.40557	0.01929
510	0.2072	0.00824	0.24355	0.00613	0.24182	0.01241	0.21937	0.00577	0.23089	0.01583
520	0.10862	0.00487	0.1276	0.0045	0.12078	0.01258	0.10884	0.00274	0.11141	0.01294
530	0.0515	0.00459	0.06162	0.00427	0.05172	0.0057	0.05344	0.00311	0.05776	0.00485
540	0.02129	0.00454	0.02336	0.00566	0.02387	0.00248	0.02111	0.0017	0.01295	0.00363
550	0.00949	0.00196			0.00728	0.00392			0.00654	0.00265
(B)
Wavelength (nm)	FtACR mean (n = 9 cells)	FtACR SEM	FtACR_A235C mean (n = 10 cells)	FtACR_A235C SEM	FtACR_A235S mean (n = 8 cells)	FtACR_A235S SEM	FtACR_M140G_V144A mean (n = 12 cells)	FtACR_M140G_V144A SEM
380	0.0638	0.00707	0.14188	0.03752	0.08672	0.01416
390	0.11397	0.00848	0.11668	0.03006	0.17206	0.01471	0.08798	0.01767
400	0.18132	0.00508	0.1579	0.01522	0.20551	0.01348	0.25848	0.0305
410	0.25443	0.00742	0.25094	0.02334	0.31526	0.01103	0.33749	0.02866
420	0.38276	0.00864	0.35156	0.00932	0.44152	0.01341	0.43593	0.02018
430	0.52106	0.00603	0.50526	0.0237	0.58905	0.02877	0.57899	0.03175
440	0.66932	0.00805	0.65693	0.0344	0.71812	0.0175	0.68706	0.02894
450	0.79365	0.00616	0.76116	0.00968	0.87297	0.0164	0.83055	0.01754
460	0.90568	0.00572	0.8616	0.01716	0.93702	0.00865	0.97836	0.03367
470	0.94103	0	0.87292	0.01217	0.93857	1.18202e-08	0.88144	0.0122
480	1	0.00792	1	0.00986	1	0.01402	1	0.01214
490	0.88947	0.00762	0.87063	0.02313	0.88301	0.02136	0.86487	0.03492
500	0.66787	0.00315	0.7212	0.02335	0.69219	0.02583	0.70931	0.02421
510	0.43165	0.00329	0.508	0.02546	0.45975	0.02262	0.45307	0.03532
520	0.24433	0.00297	0.32602	0.02089	0.26954	0.01428	0.27635	0.02722
530	0.12617	0.00446	0.16725	0.0211	0.11293	0.01067	0.15312	0.0289
540	0.04744	0.00381	0.08944	0.01799	0.05904	0.007	0.09939	0.01634
550	0.02075	0.00391	0.06581	0.02713	0.0189	0.00655	0.04418	0.02623
560	0.01269	0.00412
(C)
Wavelength (nm)	NlCCR mean (n = 9 cells)	NlCCR SEM	NlCCR_M141A mean (n = 7 cells)	NlCCR_M141A SEM	NlCCR_M141G mean (n = 10 cells)	NlCCR_M141G SEM
380	0.1178	0.01541	0.17459	0.0022	0.13108	0.01939
390	0.26455	0.00696	0.30478	0.00551	0.28041	0.02386
400	0.46019	0.01172	0.44778	0.00742	0.42722	0.02516
410	0.59993	0.01642	0.59444	0.00929	0.55902	0.02574
420	0.74997	0.02352	0.7625	0.01189	0.73305	0.02751
430	0.93048	0.00928	0.91308	0.00983	0.85595	0.02895
440	0.99521	0.01528	0.98338	0.01147	0.96852	0.01847
450	1	0.00781	1	0.0082	1	0.01191
460	0.92793	0.00877	0.94575	0.00311	0.9192	0.01053
470	0.75006	0.01176	0.72559	0.00333	0.74435	0.01282
480	0.5508	0.01134	0.58233	0.00265	0.53253	0.01249
490	0.32696	0.01333	0.34417	0.0031	0.30974	0.01827
500	0.16751	0.00551	0.17584	0.00296	0.14772	0.01457
510	0.06847	0.00476	0.07792	0.00158	0.06312	0.00982
520	0.01942	0.00498	0.03165	0.00251	0.04195	0.00841
530	0.0039	0.00591	0.01349	0.00104
540	0.00548	0.00226	0.00688	0.00146
(D)
Wavelength (nm)	AnsACR mean (n = 14 cells)	AnsACR SEM	AnsACR_T90S mean (n = 8 cells)	AnsACR_T90S SEM	AnsACR_D226E mean (n = 5 cells)	AnsACR_D226E SEM	AnsACR_T90S_D226E mean (n = 5 cells)	AnsACR_T90S_D226E SEM
380	0.10541	0.00667	0.1129	0.00911	0.13017	0.0388	0.08315	0.01934
390	0.1803	0.02018	0.19114	0.0082	0.17757	0.0388	0.15089	0.02676
400	0.29892	0.0105	0.29681	0.01017	0.23419	0.03398	0.24073	0.02273
410	0.41784	0.01195	0.41222	0.01412	0.33529	0.00855	0.35587	0.01674
420	0.58807	0.01618	0.55236	0.01381	0.44647	0.02787	0.50686	0.02756
430	0.76193	0.01599	0.72397	0.01858	0.61394	0.03362	0.61322	0.00765
440	0.88948	0.01898	0.83928	0.01351	0.76159	0.03464	0.7655	0.01144
450	0.97367	0.01336	0.92724	0.01604	0.88847	0.03312	0.88296	0.0148
460	1	0.00741	1	0.00803	1	0.02183	1	0.0187
470	0.92271	8.0895e-09	0.89399	0	0.93795	3.45903e-08	0.99427	0
480	0.8467	0.00709	0.83609	0.00897	0.98597	0.01584	0.96509	0.0141
490	0.60896	0.00783	0.59266	0.00827	0.84266	0.01249	0.87614	0.01743
500	0.37605	0.01143	0.38551	0.00796	0.63822	0.02389	0.63532	0.01322
510	0.2072	0.00824	0.20715	0.00592	0.41504	0.02863	0.42522	0.028
520	0.10862	0.00487	0.0956	0.00328	0.27448	0.02073	0.21125	0.01929
530	0.0515	0.00459	0.04996	0.00457	0.14616	0.01531	0.11869	0.01285
540	0.02129	0.00454	0.01752	0.00395	0.06332	0.01768	0.03024	0.00745
550	0.00949	0.00196	0.00264	0.00223
