# Supplementary material for: Blue-shifted ancyromonad channelrhodopsins for multiplex optogenetics
Source: eLife. 2025 Sep 19;14:RP106508. doi: 10.7554/eLife.106508 (PMC12448745; doi:10.7554/eLife.106508)
Supplement: Figure 5—source data 1. [file elife-106508-fig5-data1.xlsx]

## Sheet: Sheet1
Figure 5 – Source data 1
Source data for the numbers of cells sampled and numerical values shown in (C-K).
(C)
Wavelength (nm)	GtACR1 mean (n = 8 cells)	GtACR1 SEM	GtACR1_S97F mean (n = 6 cells)	GtACR1_S97F SEM	GtACR1_C133M mean (n = 4 cells)	GtACR1_C133M SEM	GtACR1_C237A mean (n = 6)	GtACR1_C237A SEM
400	0.10327	0.00528	0.10031	0.01018	0.11159	0.0037	0.13174	0.00286
410	0.12972	0.00395	0.10239	0.01664	0.11461	0.00561	0.1289	0.00522
420	0.16239	0.00329	0.12559	0.00909	0.14163	0.00532	0.15592	0.00366
430	0.21432	0.00173	0.16101	0.00663	0.17458	0.00455	0.19565	0.00426
440	0.26019	0.0046	0.20806	0.00929	0.21614	0.00809	0.2407	0.00444
450	0.34352	0.00464	0.2811	0.00721	0.27655	0.00605	0.30041	0.00202
460	0.44689	0.00644	0.3684	0.01505	0.37093	0.0097	0.39219	0.00469
470	0.57584	0.0111	0.4916	0.01901	0.47882	0.00665	0.51368	0.00756
480	0.67733	0.00763	0.59787	0.01789	0.60343	0.00696	0.62659	0.00534
490	0.79172	0.00461	0.71339	0.02667	0.71944	0.00929	0.74739	0.01158
500	0.89967	0.00789	0.82322	0.01528	0.82447	0.01495	0.85151	0.01611
510	0.96102	0.00945	0.91744	0.01798	0.93294	0.01268	0.93885	0.015
520	1	0.00115	0.96379	0.00747	0.99712	0.00151	0.98807	0.01111
530	0.94398	0.00435	1.0101	0.000324937	1	0.00649	1	0.00582
540	0.82858	0.00805	0.92811	0.01668	0.95648	0.01777	0.94674	0.01139
550	0.67984	0.01435	0.83252	0.01867	0.81763	0.01011	0.83365	0.00956
560	0.50234	0.01306	0.70947	0.01745	0.63322	0.00762	0.66905	0.01129
570	0.33322	0.00579	0.55306	0.01597	0.46188	0.01085	0.50204	0.00827
580	0.20425	0.00281	0.40991	0.01543	0.31197	0.00976	0.35868	0.00637
590	0.12378	0.00271	0.28401	0.01611	0.18445	0.00285	0.22487	0.00539
600	0.06734	0.00234	0.17589	0.01237	0.0987	0.0021	0.13702	0.00539
610	0.03204	0.00306	0.10264	0.00892	0.05161	0.00259	0.07816	0.00351
620	0.01442	0.000899318	0.06088	0.00961	0.02303	0.00189	0.04181	0.00547
630			0.02666	0.00774			0.02585	0.00453
(D)
Wavelength (nm)	HfACR1 mean (n = 6 cells)	HfACR1 SEM	HfACR1_F104S mean (n = 8 cells)	HfACR1_F104S SEM	HfACR1_M143C mean (n = 7 cells)	HfACR1_M143C SEM	HfACR1_A242C mean (n = 4 cells)	HfACR1_A242C SEM
540	0.62181	0.02156	0.83773	0.01507	0.75672	0.03581	0.70721	0.02243
550	0.66402	0.02501	0.89989	0.02345	0.80243	0.03233	0.76446	0.01455
560	0.7472	0.02524	0.95293	0.01699	0.89454	0.0304	0.83829	0.01286
570	0.84276	0.02426	1	0.00256	0.95558	0.02179	0.92388	0.00396
580	0.90334	0.03247	0.98105	0.01992	1	0.01022	0.98105	0.0056
590	0.95451	0.03207	0.93245	0.01564	0.99837	0.02155	1	0.00772
600	0.98758	0.03024	0.87144	0.01925	0.96789	0.03765	0.98643	0.01328
610	1	0.03001	0.76789	0.01456	0.93739	0.04974	0.96506	0.01836
620	0.97035	0.03581	0.64503	0.01289	0.86638	0.0607	0.90771	0.03424
630	0.87996	0.03212	0.48608	0.0384	0.71118	0.06556	0.76347	0.01908
640	0.74297	0.02663	0.31205	0.03051	0.55917	0.05545	0.59964	0.01952
650	0.576	0.02898	0.22175	0.01861	0.40867	0.04599	0.44276	0.02438
660	0.43016	0.02054	0.14201	0.0171	0.27767	0.0384	0.31024	0.01865
670	0.30697	0.01595	0.08808	0.01572	0.18511	0.03041	0.21365	0.02538
680	0.21007	0.01234	0.04981	0.0064	0.09761	0.0162	0.14951	0.00875
690	0.13332	0.0075	0.01772	0.01854	0.05785	0.01595	0.08524	0.01274
(E)
Wavelength (nm)	NlCCR mean (n = 9 cells)	NlCCR SEM	NlCCR_F85S mean (n = 8 cells)	NlCCR_F85S SEM	NlCCR_M141C mean (n = 8 cells)	NlCCR_M141C SEM	NlCCR_A236C mean (n = 4 cells)	NlCCR_A236C SEM
380	0.1178	0.01541	0.17624	0.00664	0.18424	0.01018	0.17022	0.01369
390	0.26455	0.00696	0.25393	0.00707	0.30768	0.01992	0.29804	0.02996
400	0.46019	0.01172	0.39623	0.00538	0.45946	0.01623	0.45189	0.03131
410	0.59993	0.01642	0.53921	0.00542	0.58531	0.01973	0.58486	0.03047
420	0.74997	0.02352	0.70785	0.0067	0.75176	0.0278	0.75369	0.0281
430	0.93048	0.00928	0.8636	0.00668	0.92441	0.02149	0.89247	0.02796
440	0.99521	0.01528	0.96547	0.00929	0.99511	0.02156	0.96552	0.01905
450	1	0.00781	1	0.00594	1	0.01036	1	0.01484
460	0.92793	0.00877	0.94963	0.00791	0.94812	0.00614	0.96279	0.00874
470	0.75006	0.01176	0.92124	0.00181	0.79157	0.01444	0.89558	0.00835
480	0.5508	0.01134	0.64028	0.00635	0.62677	0.02348	0.7122	0.01627
490	0.32696	0.01333	0.41751	0.00544	0.37431	0.0159	0.48815	0.01119
500	0.16751	0.00551	0.22777	0.00477	0.21122	0.01332	0.31015	0.01256
510	0.06847	0.00476	0.11023	0.00481	0.10285	0.00705	0.18075	0.01055
520	0.01942	0.00498	0.05486	0.0025	0.04906	0.00734	0.09017	0.00673
530	0.0039	0.00591	0.0283	0.00332	0.02289	0.00407	0.04305	0.0039
540	0.00548	0.00226	0.01338	0.00212	0.00798	0.00322	0.01689	0.00188
550							0.00874	0.0019
560							0.00294	0.00315
(F)
Wavelength (nm)	HfACR1 mean (n = 6 cells)	HfACR1 SEM	HfACR1_M143V mean (n = 4 cells)	HfACR1_M143V SEM
540	0.62181	0.02156	0.77137	0.03377
550	0.66402	0.02501	0.82965	0.01987
560	0.7472	0.02524	0.91448	0.01408
570	0.84276	0.02426	0.96581	0.00688
580	0.90334	0.03247	1	0.000834831
590	0.95451	0.03207	0.98385	0.00793
600	0.98758	0.03024	0.93404	0.01778
610	1	0.03001	0.88188	0.01875
620	0.97035	0.03581	0.79189	0.02135
630	0.87996	0.03212	0.62766	0.02028
640	0.74297	0.02663	0.45659	0.01262
650	0.576	0.02898	0.31782	0.00817
660	0.43016	0.02054	0.19971	0.00498
670	0.30697	0.01595	0.11836	0.00345
680	0.21007	0.01234	0.06612	0.0039
690	0.13332	0.0075	0.0374	0.00374
(G)
Wavelength (nm)	AnsACR mean (n = 14 cells)	AnsACR SEM	AnsACR_M134V mean (n = 8 cells)	AnsACR_M134V SEM
380	0.10541	0.00667	0.09782	0.00344
390	0.1803	0.02018	0.17512	0.00591
400	0.29892	0.0105	0.26265	0.00452
410	0.41784	0.01195	0.36843	0.01048
420	0.58807	0.01618	0.52658	0.00605
430	0.76193	0.01599	0.68879	0.00594
440	0.88948	0.01898	0.82655	0.00719
450	0.97367	0.01336	0.92647	0.00542
460	1	0.00741	1	0.00718
470	0.92271	8.0895e-09	0.95738	0
480	0.8467	0.00709	0.95283	0.00414
490	0.60896	0.00783	0.76637	0.00624
500	0.37605	0.01143	0.5352	0.0069
510	0.2072	0.00824	0.32143	0.00431
520	0.10862	0.00487	0.17594	0.00416
530	0.0515	0.00459	0.08521	0.00402
540	0.02129	0.00454	0.03649	0.00378
550	0.00949	0.00196	0.02048	0.00288
560			0.00729	0.0026
(H)
Wavelength (nm)	NlCCR mean (n = 9 cells)	NlCCR SEM	NlCCR_M141V mean (n = 7 cells)	NlCCR_M141V SEM
380	0.1178	0.01541	0.15815	0.01921
390	0.26455	0.00696	0.30512	0.01705
400	0.46019	0.01172	0.39802	0.02735
410	0.59993	0.01642	0.52746	0.02177
420	0.74997	0.02352	0.71003	0.02971
430	0.93048	0.00928	0.85744	0.03373
440	0.99521	0.01528	0.97829	0.03106
450	1	0.00781	1	0.02992
460	0.92793	0.00877	0.96503	0.01473
470	0.75006	0.01176	0.94225	0.00641
480	0.5508	0.01134	0.68487	0.01401
490	0.32696	0.01333	0.44725	0.01758
500	0.16751	0.00551	0.27059	0.01045
510	0.06847	0.00476	0.1403	0.01124
520	0.01942	0.00498	0.04918	0.01214
530	0.0039	0.00591	0.02577	0.00538
540	0.00548	0.00226
(I)
Wavelength (nm)	FtACR mean (n = 9 cells)	FtACR SEM	FtACR_L96Q mean (n = 8 cells)	FtACR_L96Q SEM
380	0.0638	0.00707	0.10973	0.01296
390	0.11397	0.00848	0.22162	0.01646
400	0.18132	0.00508	0.34207	0.02239
410	0.25443	0.00742	0.47849	0.01281
420	0.38276	0.00864	0.63421	0.01217
430	0.52106	0.00603	0.8267	0.01563
440	0.66932	0.00805	0.93793	0.00747
450	0.79365	0.00616	1	0.01328
460	0.90568	0.00572	0.99554	0.01358
470	0.94103	0	0.88446	0.00276
480	1	0.00792	0.7409	0.013
490	0.88947	0.00762	0.47003	0.00872
500	0.66787	0.00315	0.26823	0.01157
510	0.43165	0.00329	0.1349	0.00696
520	0.24433	0.00297	0.05818	0.00503
530	0.12617	0.00446	0.02139	0.00637
540	0.04744	0.00381	0.00308	0.00163
550	0.02075	0.00391
560	0.01269	0.00412
(J)
Wavelength (nm)	NlCCR mean (n = 9 cells)	NlCCR SEM	NlCCR_M93Q mean (n = 6 cells)	NlCCR_M93Q SEM
380	0.1178	0.01541	0.20478	0.0169
390	0.26455	0.00696	0.3545	0.02444
400	0.46019	0.01172	0.5314	0.03072
410	0.59993	0.01642	0.66273	0.02943
420	0.74997	0.02352	0.844	0.03192
430	0.93048	0.00928	0.97867	0.02281
440	0.99521	0.01528	1	0.01088
450	1	0.00781	0.97314	0.00131
460	0.92793	0.00877	0.82543	0.01132
470	0.75006	0.01176	0.61808	0.01428
480	0.5508	0.01134	0.40383	0.01563
490	0.32696	0.01333	0.21367	0.01099
500	0.16751	0.00551	0.10629	0.00728
510	0.06847	0.00476	0.03819	0.00614
520	0.01942	0.00498	0.01883	0.00294
530	0.0039	0.00591	0.00215	0.00137
540	0.00548	0.00226
(K)
Wavelength (nm)	NlCCR mean (n = 9 cells)	NlCCR SEM	NlCCR_S89T mean (n = 8 cells)	NlCCR_S89T SEM	NlCCR_E233D mean (n = 8 cells)	NlCCR_E233D SEM	NlCCR_P235I mean (n = 5 cells)	NlCCR_P235I SEM
380	0.1178	0.01541	0.14923	0.01113	0.14152	0.02433	0.16366	0.00533
390	0.26455	0.00696	0.27562	0.01892	0.23856	0.02805	0.25243	0.01295
400	0.46019	0.01172	0.41474	0.02683	0.37708	0.03981	0.39571	0.01594
410	0.59993	0.01642	0.5411	0.03152	0.51935	0.03779	0.53823	0.01981
420	0.74997	0.02352	0.72024	0.02602	0.69365	0.05345	0.71006	0.01941
430	0.93048	0.00928	0.86972	0.02807	0.78673	0.05004	0.85623	0.01529
440	0.99521	0.01528	0.96725	0.02547	0.95466	0.03738	0.95184	0.01757
450	1	0.00781	1	0.01849	1	0.02879	1.01007	0.01024
460	0.92793	0.00877	0.95933	0.00719	0.96537	0.02091	0.95425	0.00915
470	0.75006	0.01176	0.89111	0.01258	0.94837	0.00268	0.92321	0
480	0.5508	0.01134	0.62438	0.01449	0.69168	0.01638	0.65138	0.00969
490	0.32696	0.01333	0.3741	0.01359	0.48372	0.02712	0.43849	0.00807
500	0.16751	0.00551	0.1922	0.01029	0.28598	0.02371	0.24797	0.0076
510	0.06847	0.00476	0.08234	0.00582	0.11696	0.0103	0.12327	0.00579
520	0.01942	0.00498	0.03828	0.00314	0.04437	0.00528	0.0599	0.00497
530	0.0039	0.00591	0.01316	0.00225			0.03216	0.00418
540	0.00548	0.00226	0.00569	0.000719037			0.01693	0.00663
