# Supplementary material for: Blue-shifted ancyromonad channelrhodopsins for multiplex optogenetics
Source: eLife. 2025 Sep 19;14:RP106508. doi: 10.7554/eLife.106508 (PMC12448745; doi:10.7554/eLife.106508)
Supplement: Figure 6—source data 1. [file elife-106508-fig6-data1.xlsx]

## Sheet: Sheet1
Figure 6 – Source data 1
Source data for the numerical values shown in (A) and (G-I).
(A) The 2P photocurrent action spectra
	AnsACR		FtACR			NlCCR
Wavelength (nm)	mean	SEM	mean	SEM	mean	SEM
800	0.30598	0.01541	0.1854	0.05467	0.474	0.03079
840	0.56393	0.01753	0.40475	0.09988	0.6898	0.0469
880	0.8316	0.01994	0.6645	0.07052	0.97263	0.01297
920	1	1.27902e-06	0.93554	0.06538	0.87643	0.02162
960	0.85605	0.02331	1.04521	0.02701	0.39316	0.04198
1000	0.45819	0.02005	0.87414	0.07512	0.09958	0.01212
1040	0.11059	0.01328	0.3037	0.03085	0.00275	0.00107
1080	0.00529	0.00283	0.0221	0.00377	0.00213	0.00128
(G) Peak current (nA)
AnsACR	FtACR	NlCCR	GtACR1	GtACR2
0.67032	0.16313	3.43319	1.26103	1.69584
0.34785	0.10945	0.87019	1.67276	1.93812
0.22149	0.20296	1.30089	0.96938	1.85042
0.39718	0.10395	1.4763	0.70054	1.06962
0.05115	0.23935	0.839	0.95198	1.50238
(H) End current (nA)
AnsACR	FtACR	NlCCR	GtACR1	GtACR2
0.47046	0.07797	1.8221	0.91152	1.2732
0.22839	0.067	0.65069	1.1595	1.5116
0.11925	0.11109	0.97071	0.70591	1.3937
0.22224	0.06304	0.79713	0.56659	0.66368
0.01434	0.14753	0.63363	0.7344	0.92845
(I) Desensitization (%)
AnsACR	FtACR	NlCCR	GtACR1	GtACR2
75.9025	64.4024	58.6343	79.5717	80.0839
71.4579	77.3917	84.772	74.8894	83.3489
69.1442	86.4053	83.9694	80.8767	80.5678
65.9026	76.7105	61.598	83.5579	67.5171
47.4088	85.5152	89.0641	83.9148	73.8166
