# Supplementary material for: Blue-shifted ancyromonad channelrhodopsins for multiplex optogenetics
Source: eLife. 2025 Sep 19;14:RP106508. doi: 10.7554/eLife.106508 (PMC12448745; doi:10.7554/eLife.106508)
Supplement: Figure 7—figure supplement 1—source data 1. [file elife-106508-fig7-figsupp1-data1.xlsx]

## Sheet: Sheet1
Figure 7 – figure supplement 1 – Source Data 1
Source data for the numbers of cells sampled and numerical values shown in (B, D).
(B) Resting membrane potentials, input resistances, and capacitances of AnsACR+ and FtACR+ neurons
Resting membrane potential (mV)			Input reistance (MΩ)			Capacitance (nF)
AnsACR	FtACR		AnsACR	FtACR		AnsACR	FtACR
-59.0792	-69.696		158.274	124.679		0.255106	0.18347
-54.1951	-61.3118		140.518	155.198		0.190012	0.192916
-64.4514	-71.406		170.446	87.837		0.182695	0.224971
-69.1087	-64.8535		154.287	93.782		0.223461	0.257026
-73.7638	-60.5693		109.435	73.421		0.163058	0.259759
-75.7237	-71.034		101.629	145.312		0.189617	0.214658
-78.5367	-65.3735		84.045	157.067		0.350784	0.212237
-73.1012	-71.4392		106.244	125.217		0.248464	0.188727
-77.1391	-71.3726		94.66	70.261		0.272993	0.219998
-73.2809	-68.6491		96.639	124.579		0.241316	0.163444
(D) Evoked EPSC amplitude (nA)
AnsACR	FtACR
1.05321	0.122791
0.354496	0.764846
0.502123	0.285541
0.142457	0.457278
0.680152	0.167247
0.156404	0.684406
0.327566	0.748569
0.487799	0.893876
0.60614	1.1342
1.00543	0.95292
0.867211
