# Supplementary material for: Blue-shifted ancyromonad channelrhodopsins for multiplex optogenetics
Source: eLife. 2025 Sep 19;14:RP106508. doi: 10.7554/eLife.106508 (PMC12448745; doi:10.7554/eLife.106508)
Supplement: Figure 7—source data 1. [file elife-106508-fig7-data1.xlsx]

## Sheet: Sheet1
Figure 7 – Source data 1
Source data for the numerical values shown in (C, D).
(C) The frequencies of action potentials evoked by different current injections with and without photoactivation of AnsACR
Current (nA)	Dark										Light
0	0	0	0	0	0	0	0	0	0	0	0	0	1	0	1	0	0	0	2	1
0.1	13	9	9	7	0	0	0	0	0	0	0	0	1	0	1	0	0	0	1	1
0.2	20	17	18	18	10	10	6	9	8	10	0	0	1	0	0	0	0	0	0	0
0.3	22	19	24	22	17	19	13	18	16	17	0	0	0	0	0	0	0	0	0	0
0.4	25	23	28	23	22	24	18	22	21	22	0	0	0	0	0	0	1	0	0	0
0.5	28	25	31	25	25	27	22	25	24	25	0	0	0	0	0	0	0	0	0	0
(D) The frequencies of action potentials evoked by different current injections with and without photoactivation of FtACR
Current (nA)	Dark										Light
0	0	0	0	0	0	0	0	0	0	0	0	1	0	1	1	0	0	1	1	0
0.1	11	8	2	3	0	7	7	2	0	6	1	0	0	1	1	0	0	1	1	0
0.2	20	21	15	12	10	19	18	17	1	18	0	0	0	1	1	0	0	0	1	0
0.3	27	27	22	17	16	23	23	25	13	23	0	0	0	1	1	0	0	0	0	0
0.4	31	29	26	21	20	26	26	30	20	24	0	0	0	0	0	0	0	0	0	0
0.5	33	32	28	23	23	28	28	32	22	24	0	0	0	1	0	0	0	0	0	0
