# Supplementary material for: Blue-shifted ancyromonad channelrhodopsins for multiplex optogenetics
Source: eLife. 2025 Sep 19;14:RP106508. doi: 10.7554/eLife.106508 (PMC12448745; doi:10.7554/eLife.106508)
Supplement: Figure 8—source data 1. [file elife-106508-fig8-data1.xlsx]

## Sheet: Sheet1
Figure 7 – Source data 1
Source data for the numerical values shown in (D, E).
(D) The frequency of the pharyngeal pumping calculated from recordings as shown in A
Time	WT + ret 2.1, mean	WT + ret 2.1, SEM	AnsACR 2.1, mean	AnsACR 2.1, SEM	AnsACR + ret 0.2, mean	AnsACR + ret 0.2, SEM	AnsACR + ret 0.7, mean	AnsACR + ret 0.7, SEM	AnsACR + ret 2.1, mean	AnsACR + ret 2.1, SEM
5	4.2223	0.1026	3.93423	0.11112	4.19079	0.06495	4.05064	0.09608	4.08483	0.08204
10	4.20759	0.09059	3.99735	0.09072	4.18465	0.0585	4.04331	0.08723	4.09363	0.07471
15	4.19738	0.07473	4.02177	0.08438	4.06179	0.09274	4.04336	0.08997	4.11137	0.09037
20	4.2042	0.08491	4.11305	0.0806	4.09347	0.07244	4.03036	0.09423	4.18502	0.08696
25	4.19122	0.07425	4.07089	0.08091	4.09163	0.07136	4.03164	0.08907	4.15764	0.06696
30	4.12375	0.08786	4.07069	0.07221	4.0503	0.05829	4.03166	0.10097	4.16617	0.08415
35	4.10544	0.09583	4.01099	0.09379	2.55438	0.25858	0.06553	0.04562	0	0
40	4.05534	0.11648	3.96099	0.08809	2.89571	0.15032	0.19989	0.12069	0	0
45	3.93771	0.14086	3.92856	0.09383	2.85625	0.18781	0.29746	0.14172	0	0
50	3.98382	0.11695	3.87943	0.11248	2.82911	0.20023	0.38672	0.18836	0.0041	0.0041
55	3.96825	0.11576	3.9271	0.11456	2.83951	0.22702	0.3783	0.14919	0.2543	0.19675
60	3.97805	0.11275	3.85941	0.12283	2.85298	0.16387	0.56038	0.16543	0.30722	0.18862
65	3.94771	0.13434	3.93418	0.11534	3.87532	0.08307	3.02603	0.12134	2.90169	0.13035
70	3.93726	0.12039	3.93587	0.10857	4.02907	0.07804	3.39609	0.133	3.41936	0.12127
75	3.98302	0.13197	3.91023	0.09476	3.99878	0.06554	3.65032	0.11867	3.67177	0.11373
80	4.05031	0.10168	3.95965	0.10422	4.06654	0.06961	3.84351	0.08871	3.71719	0.13289
85	4.07087	0.1065	3.99487	0.10506	3.94685	0.08638	3.9469	0.09558	3.93497	0.08209
90	4.0605	0.10558	4.00225	0.09515	3.89148	0.13948	4.05314	0.0819	3.96477	0.0947
95	3.99251	0.09805	4.04844	0.1227	4.02086	0.08152	4.0453	0.06354	4.02011	0.09617
100	3.95488	0.14343	4.06031	0.11872	4.04022	0.09989	3.99397	0.06785	3.97674	0.09043
105	3.96665	0.14067	3.95791	0.14705	3.98631	0.07632	3.98701	0.05973	3.97263	0.10206
110	3.96516	0.12743	3.9508	0.11358	4.0161	0.07451	3.96796	0.07537	3.98135	0.09139
115	4.05089	0.15411	3.9359	0.11295	3.95762	0.08323	3.95742	0.08152	3.9951	0.08606
120	3.99301	0.18496	3.99767	0.13128	3.93745	0.08212	3.97422	0.09126	4.00984	0.07975
(E) The dependence of the pharyngeal pumping frequency on the irradiance calculated from the 30-60 s segment of the data shown in B
WT 2.1 mW mm-2	AnsACR 0 mW mm-2	AnsACR 0.2 mW mm-2	AnsACR 0.7 mW mm-2	AnsACR 2.1 mW mm-2
	Line1	Line1	Line1	Line1
3.43974	3.49723	3.41377	0	0.06415
3.88728	4.1761	3.27154	0.2616	0
3.56764	4.21858	2.25062	0	0.13438
4.53894	4.01641	2.45595	0.1961	0.26054
4.35324	4.14768	3.03926	0	0
3.92149	3.47878	2.04759	0	0.34776
4.18383	3.83441	2.62084	0.58021	0
4.11067	3.65981
4.17294	3.53948
3.60023	3.94058
4.27646
	Line2	Line2	Line2	Line2
	3.9874	3.17519	0.01393	0
	4.72816	2.19263	0.35625	0
	3.83607	3.43275	0.17409	0
		3.27452	0.6315	0
			0.63256	0.4187
				0
